# Supplementary material for: Temporal mTOR inhibition protects Fbxw7-deficient mice from radiation-induced tumor development
Source: publisher site journal article supplement (doi:10.18632/aging.100535), 2013-02-24
Supplement: Supplementary file [file aging-v5i2-100535-supplementary-material-SD1.pdf]

**SUPPLEMENTARY DATA**

**Supplementary Table S1.** Number of mice in different genotype and treatment groups

| Genotype       | Treatment group | Gender |        | Total |
|----------------|-----------------|--------|--------|-------|
|                |                 | Male   | Female |       |
| p53+/-Fbxw7+/- | Rapamycin       | 15     | 15     | 30    |
|                | Placebo         | 15     | 15     | 30    |
| p53+/-Fbxw7+/+ | Rapamycin       | 14     | 15     | 29    |
|                | Placebo         | 14     | 14     | 28    |

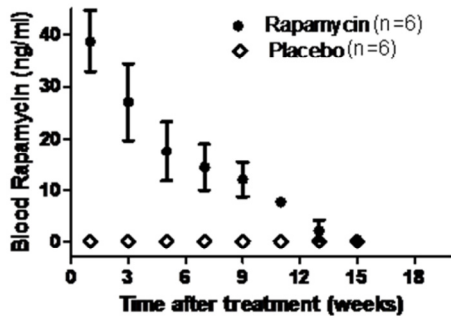

**Supplementary Figure S1.** Rapamycin levels in blood were measured by liquid chromatography-tandem mass spectrometry (LC/MS/MS) at different time points after rapamycin pellet implantation.

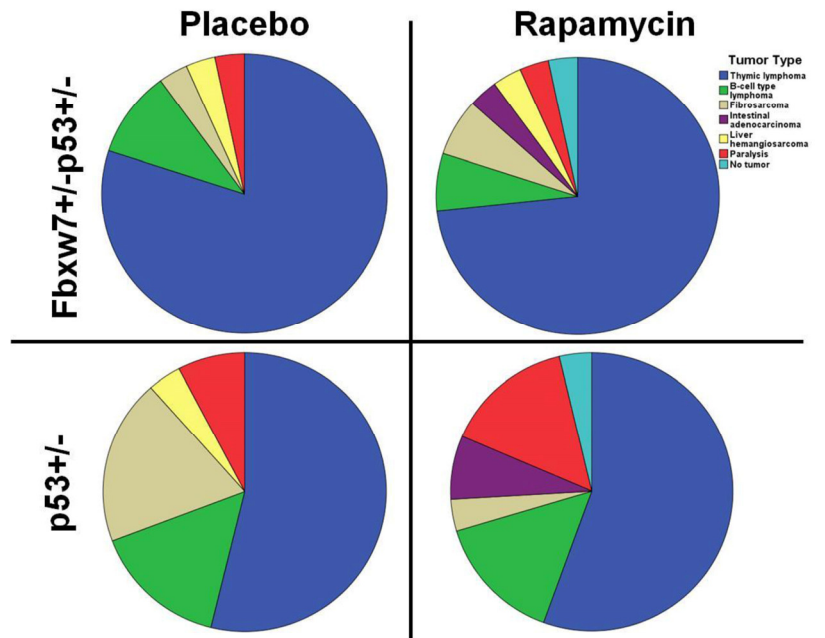

**Supplementary Figure S2.** Tumor spectrum in placebo or rapamycin treated Fbxw7+/- p53+/- or p53+/- mice.

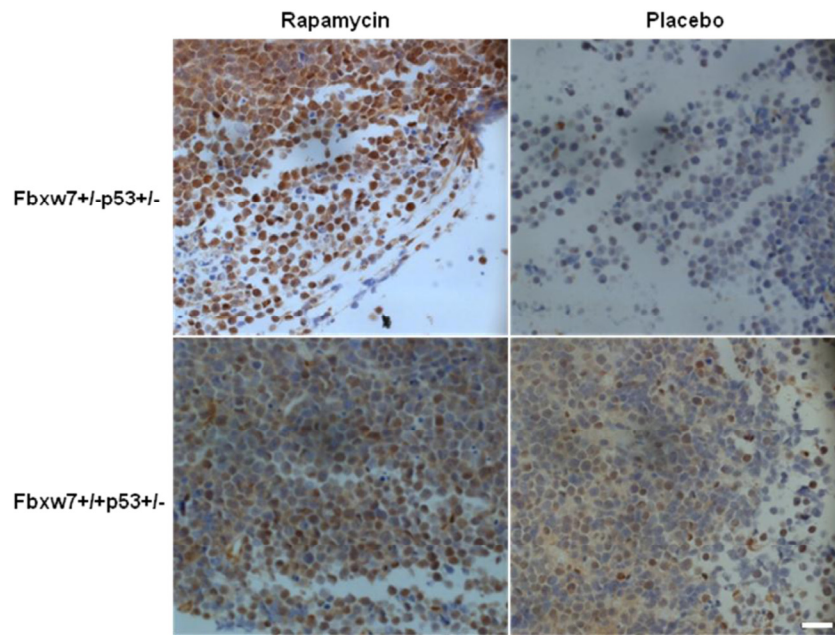

**Supplementary Figure S3.** Immunohistochemical staining of Pten in tumor from placebo or rapamycin treated Fbxw7<sup>+/-</sup> p53<sup>+/-</sup> mice.
